# Supplementary material for: Developmental Regulation of Diacylglycerol Acyltransferase Family Gene Expression in Tung Tree Tissues
Source: PLOS journal article supplement (doi:10.1371/journal.pone.0076946), 2013-10-11

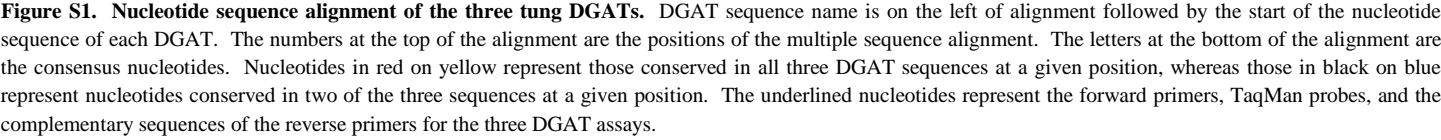

Supplement: S1 (10.1371/journal.pone.0076946.s001) [file journal.pone.0076946.s001]
